# Supplementary material for: Revisiting the Role of Esophageal Mucosal Dilated Intercellular Spaces in the Diagnosis and Pathophysiology of Heartburn
Source: PubMed Central journal article supplement — J Neurogastroenterol Motil. 2023 Oct 30;29(4):436–45. doi: 10.5056/jnm22142 (PMC10577464; doi:10.5056/jnm22142), 2023-10-30
Supplement: jnm-29-4-436-supple.pdf [file jnm-29-4-436-supple.pdf]

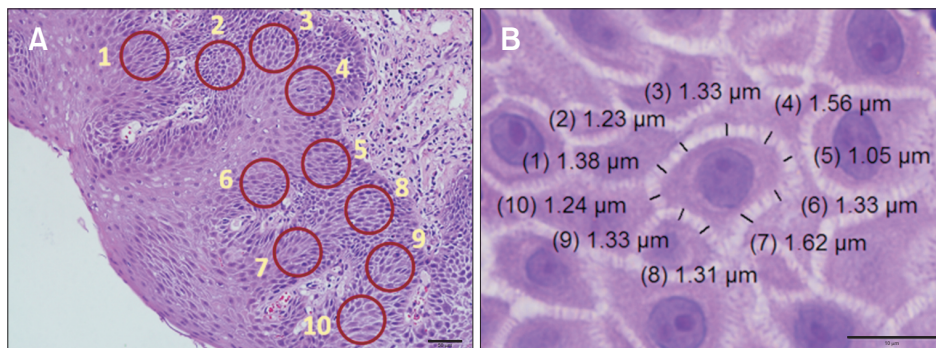

**Supplementary Figure 1.** Representative images of intercellular space (IS) measurement. (A) Ten different hotspots were photographed for each specimen (200 $\times$  magnification). (B) Ten perpendicular length measurements were performed around one epithelial cell that had the widest IS (the original 1000 $\times$  magnification photograph was zoomed with software).

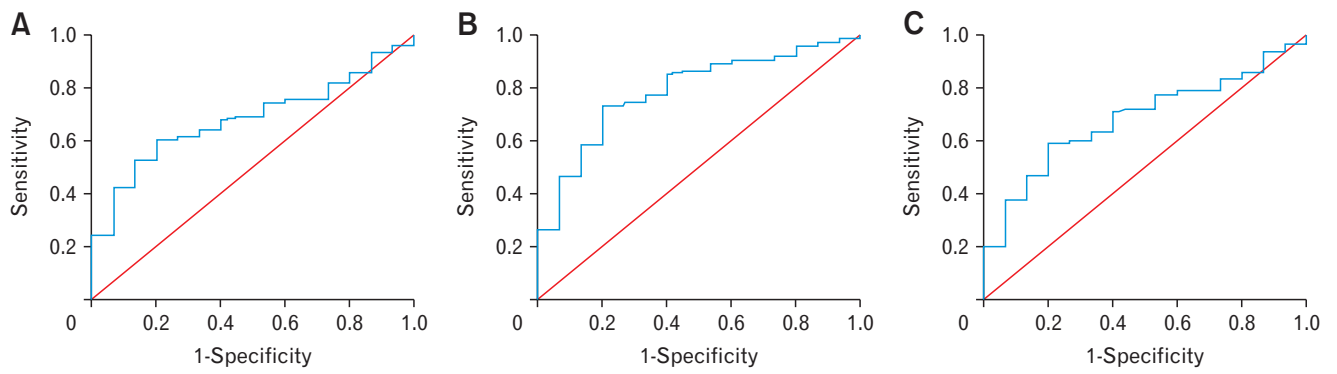

**Supplementary Figure 2.** Receiver operating characteristic curve analysis. (A) Healthy control (HC) vs acid exposure time > 6% ( $n = 78$ , area under curve [AUC] = 0.684,  $P = 0.024$ ). (B) HC vs esophagitis in upper gastrointestinal endoscopy ( $n = 75$ , AUC = 0.790,  $P < 0.001$ ). (C) HC vs all gastroesophageal reflux disease patients ( $n = 115$ , AUC = 0.684,  $P = 0.020$ ).

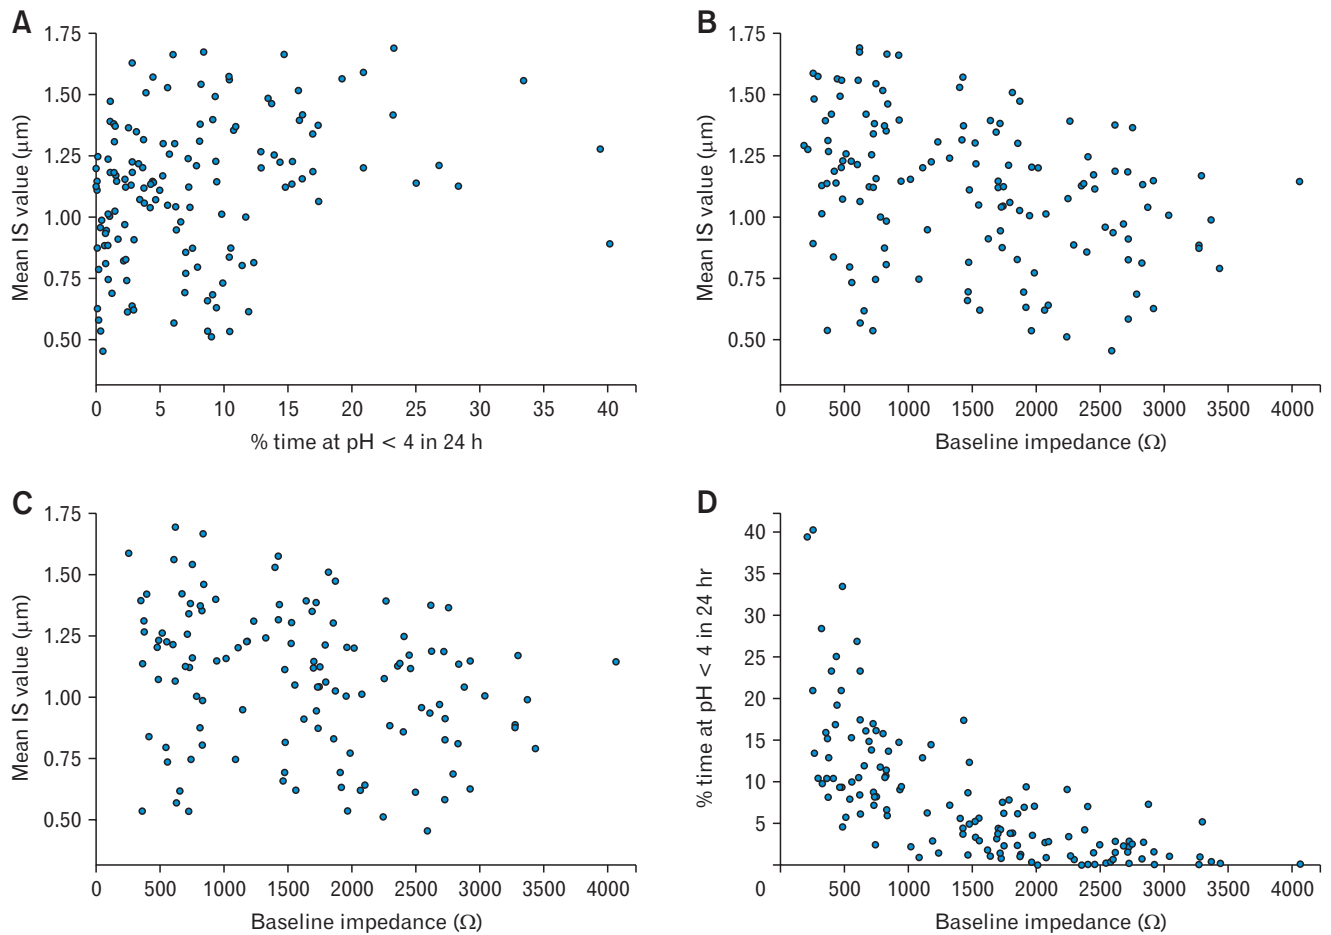

**Supplementary Figure 3.** Scatter diagrams. (A) Mean intercellular space (IS) value and % time at pH < 4 in 24 hours ( $n = 141$ , Spearman's  $\rho = 0.302$ ,  $P < 0.001$  two-tailed). (B) Mean IS value and baseline impedance (BI) ( $n = 140$ , Spearman's  $\rho = -0.359$ ,  $P < 0.001$  two-tailed). (C) Mean IS value and BI without severe erosive reflux disease patients ( $n = 125$ , Spearman's  $\rho = -0.296$ ,  $P = 0.001$  two-tailed). (D) % time at pH < 4 at 24 hours and BI ( $n = 138$ , Spearman's  $\rho = -0.783$ ,  $P < 0.001$  two-tailed).
